# Supplementary material
Source: ML conference proceedings conference paper supplement (https://openreview.net/forum?id=twhn5XvOtt)

# Caltech101

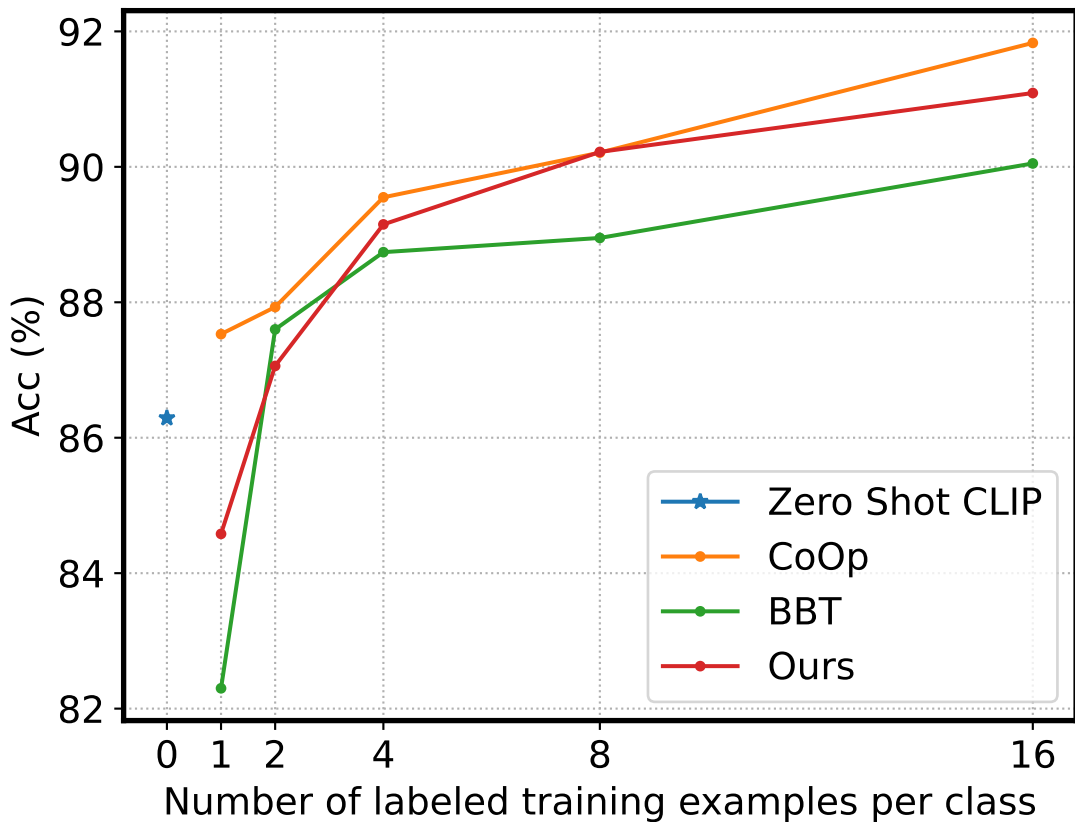

Supplement: supplementary_material [file attachment]

# SUN397

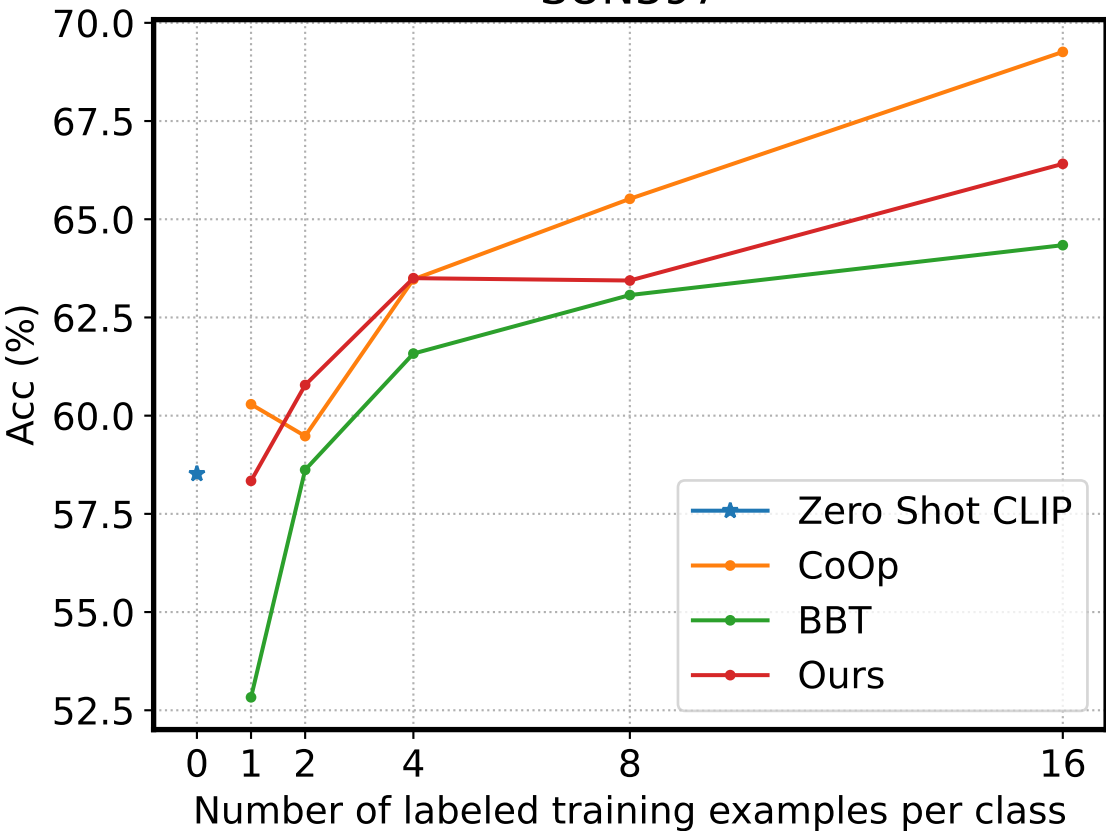

Supplement: supplementary_material [file attachment]

## DTD

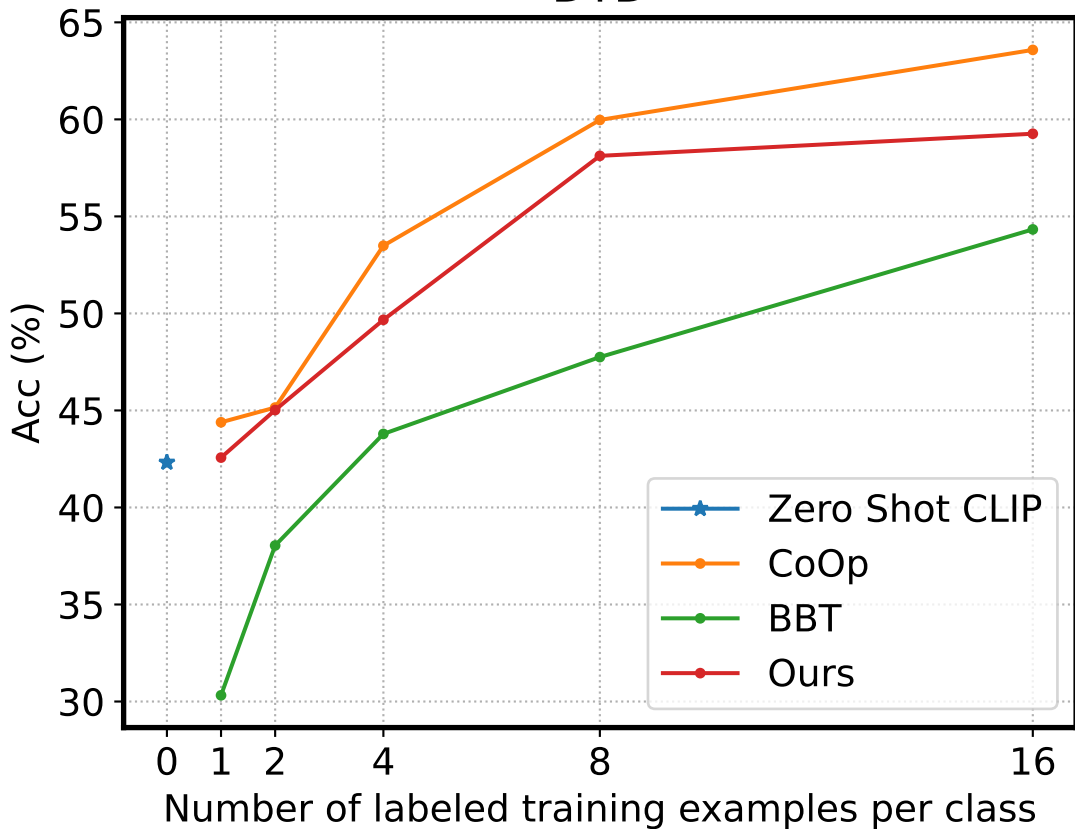

Supplement: supplementary_material [file attachment]

# EuroSAT

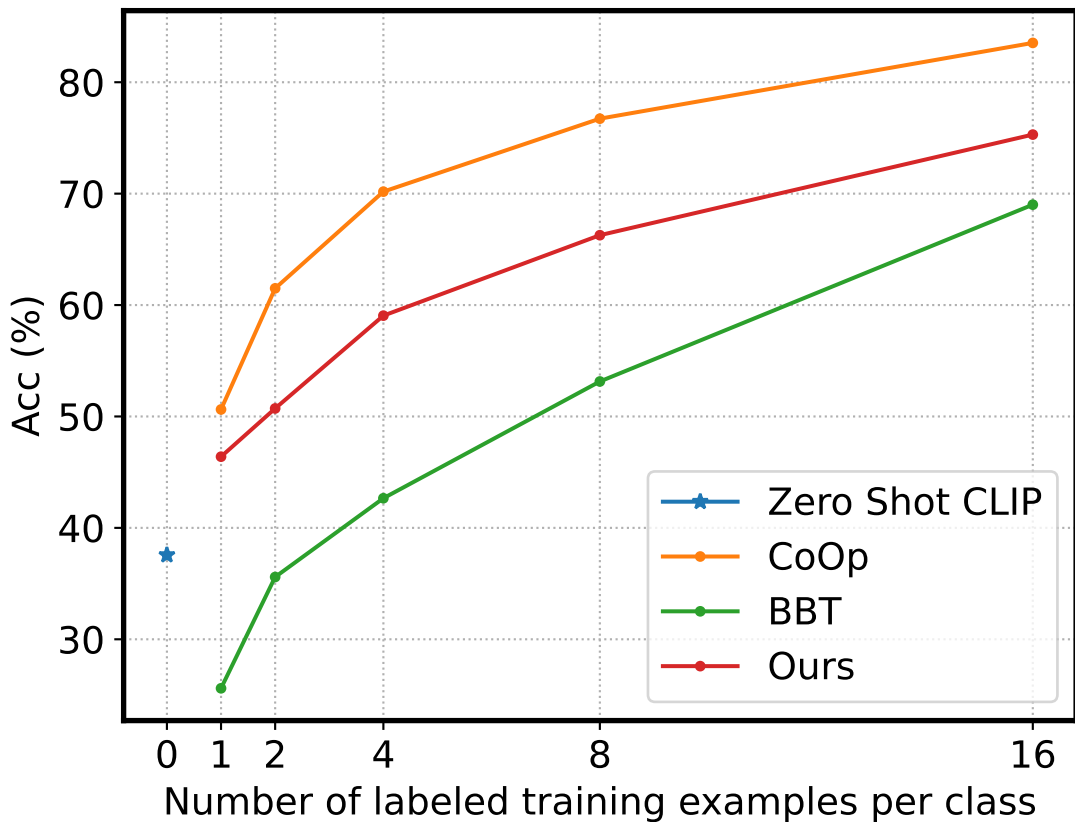

Supplement: supplementary_material [file attachment]

# StanfordCars

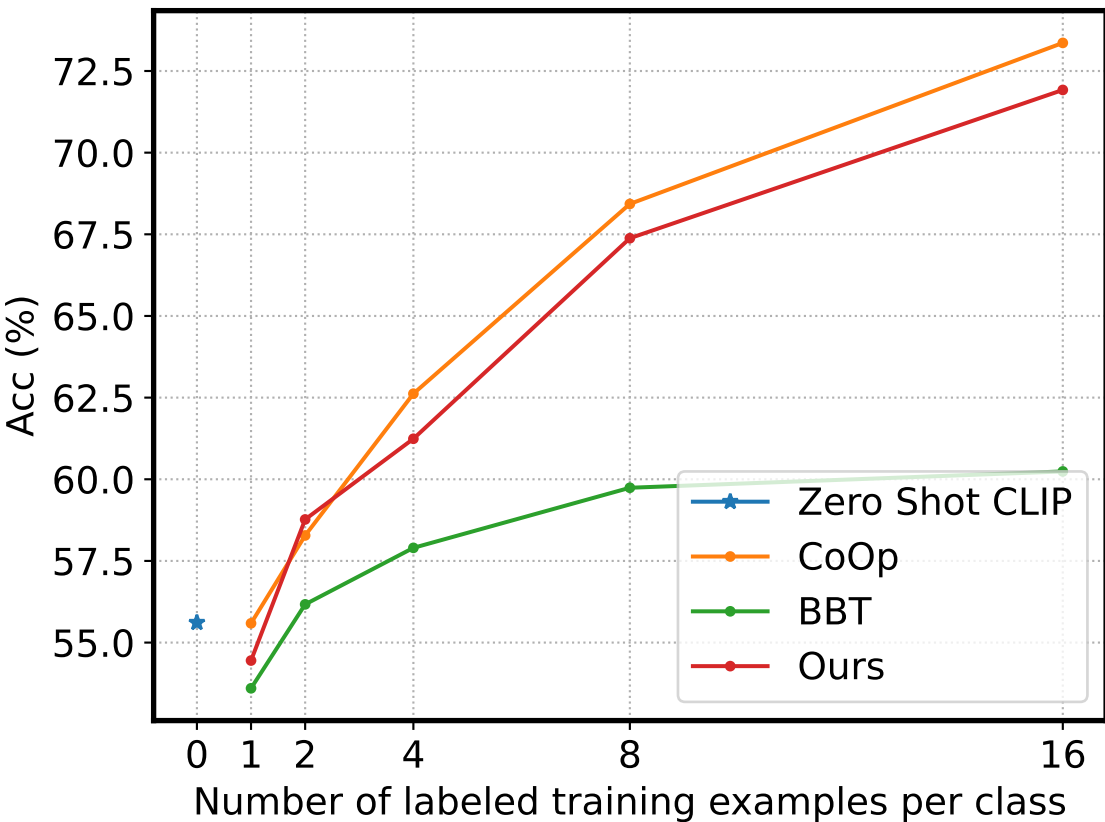

Supplement: supplementary_material [file attachment]

# UCF101

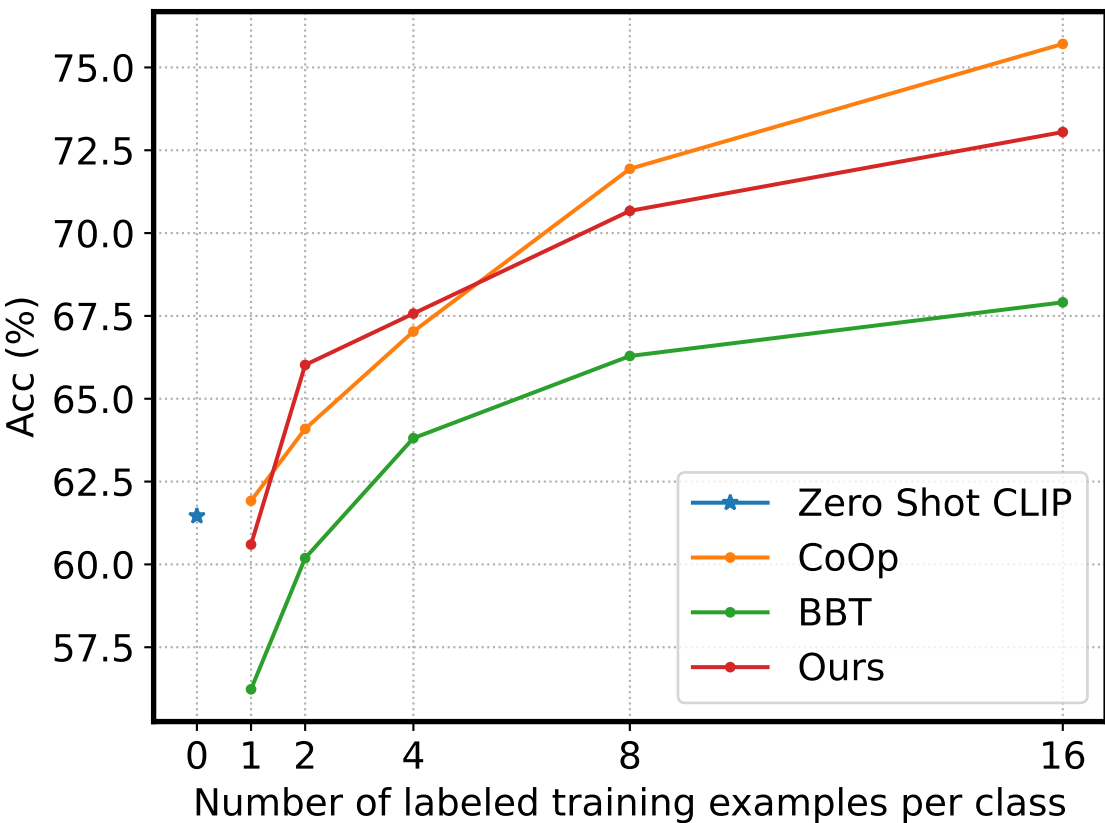

Supplement: supplementary_material [file attachment]

## Average over 11 datasets

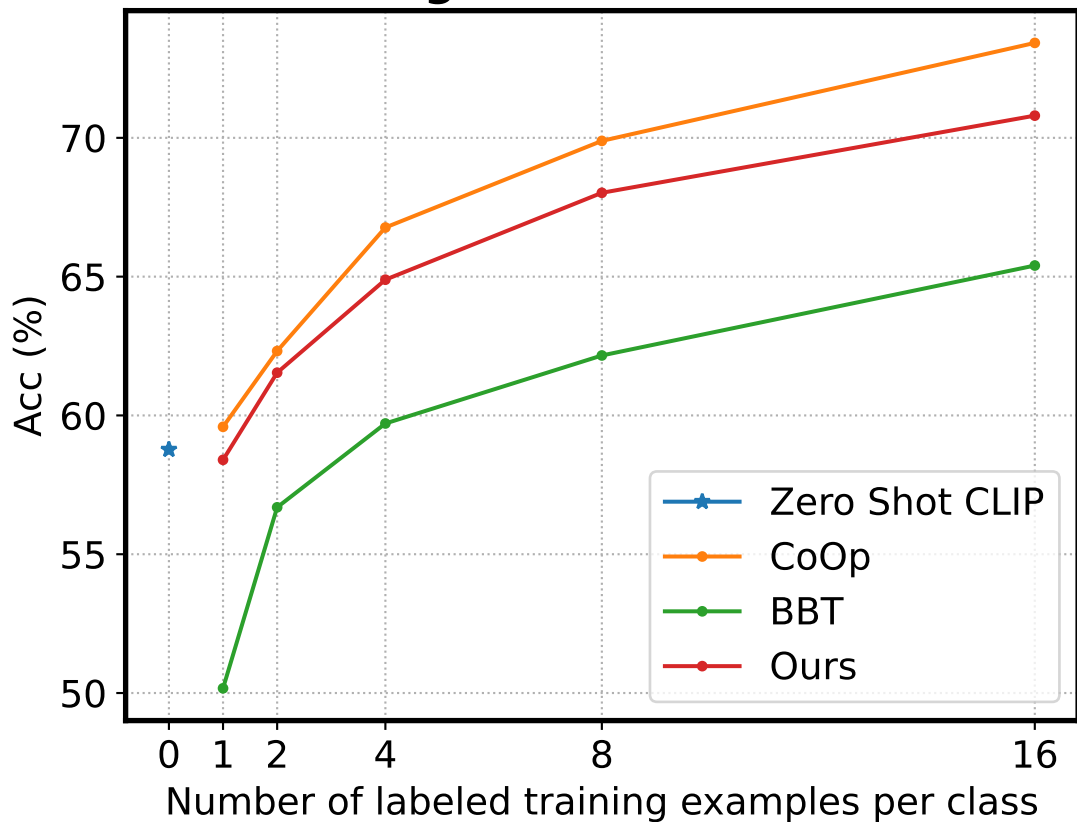

Supplement: supplementary_material [file attachment]

# ImageNet

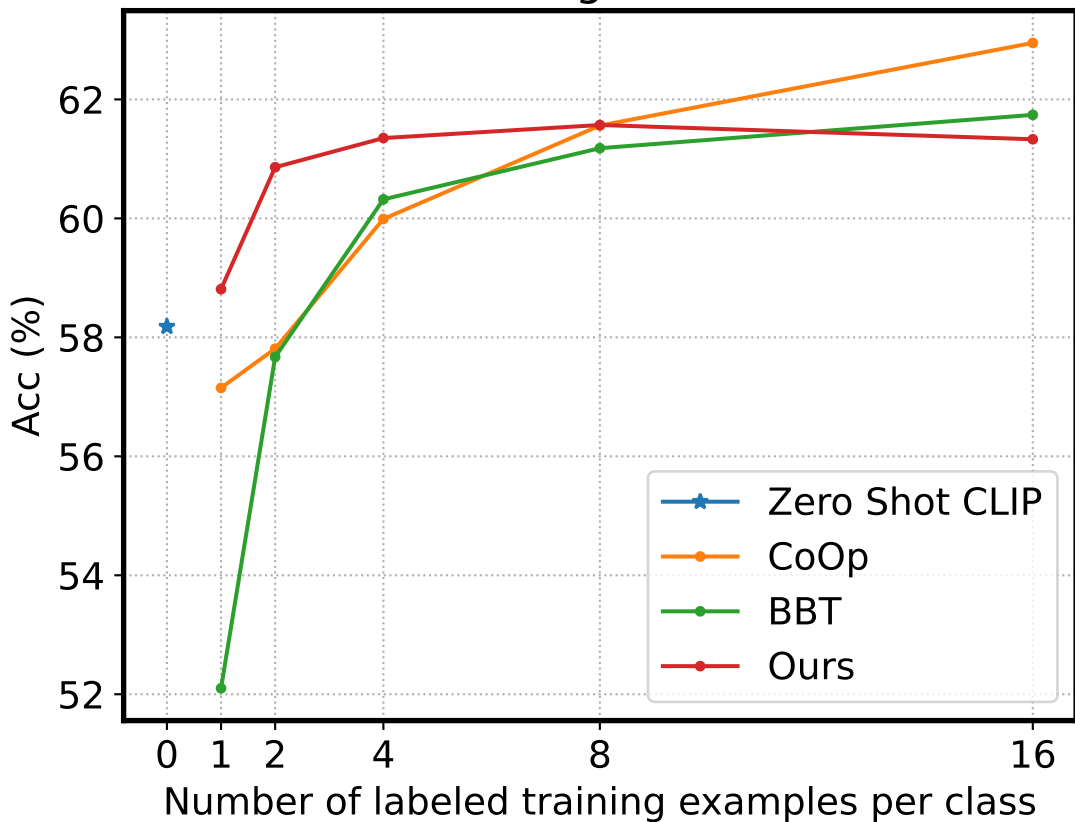

Supplement: supplementary_material [file attachment]

# ImageNet

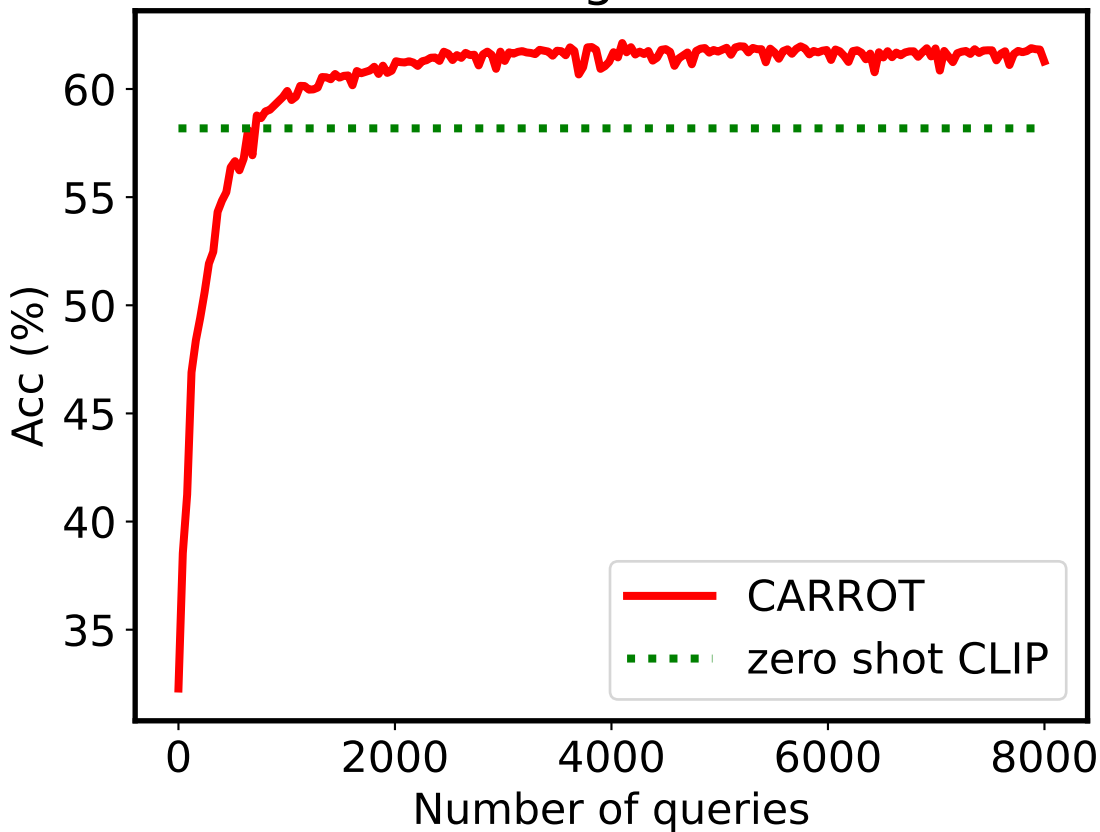

Supplement: supplementary_material [file attachment]

# OxfordPets

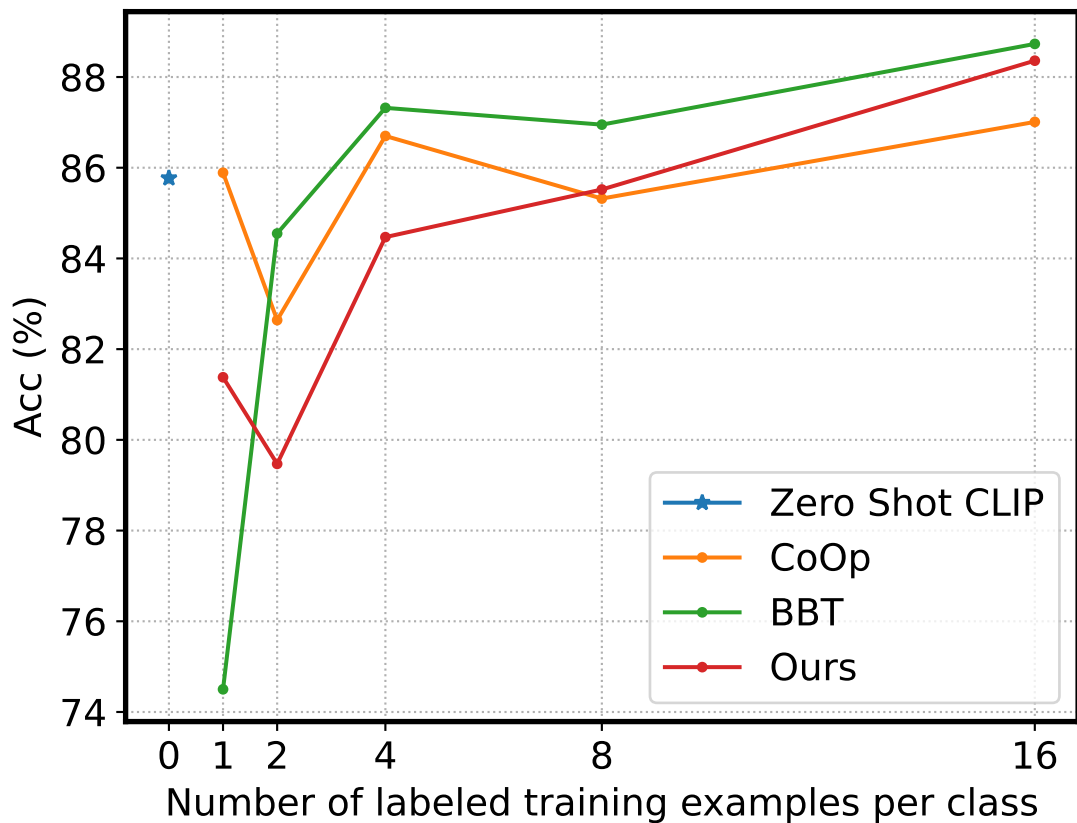

Supplement: supplementary_material [file attachment]

# FGVCAircraft

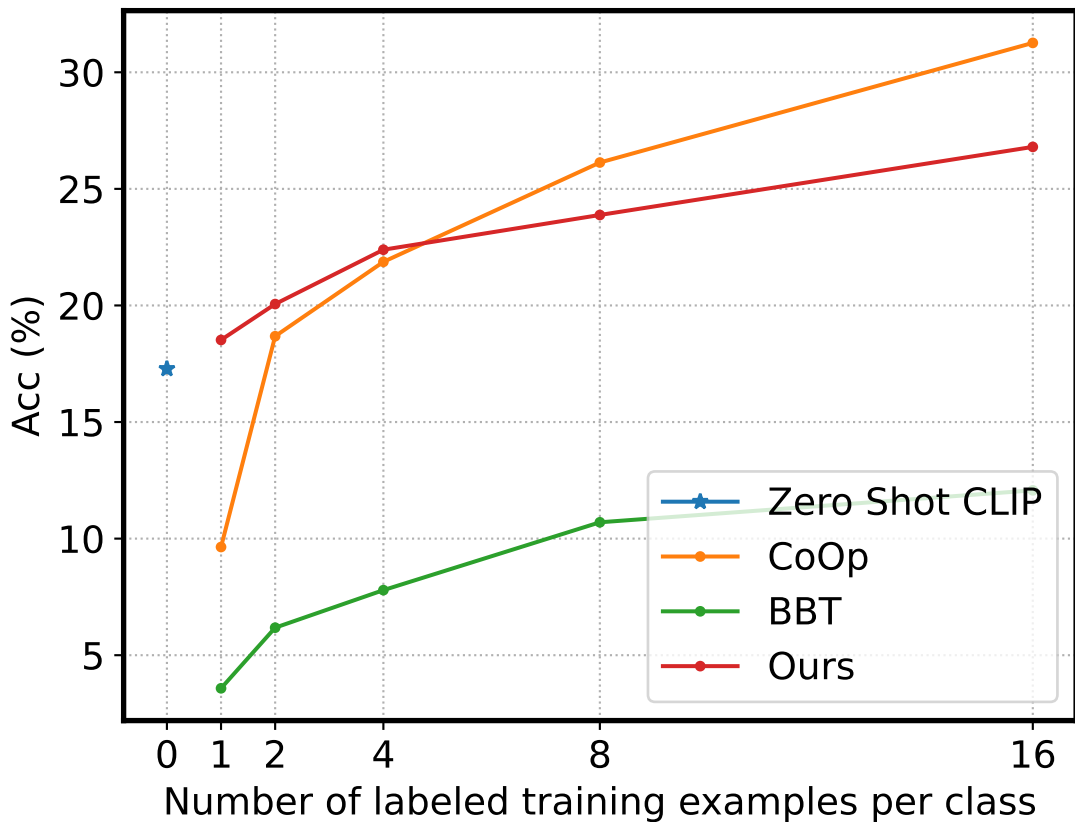

Supplement: supplementary_material [file attachment]

Food101

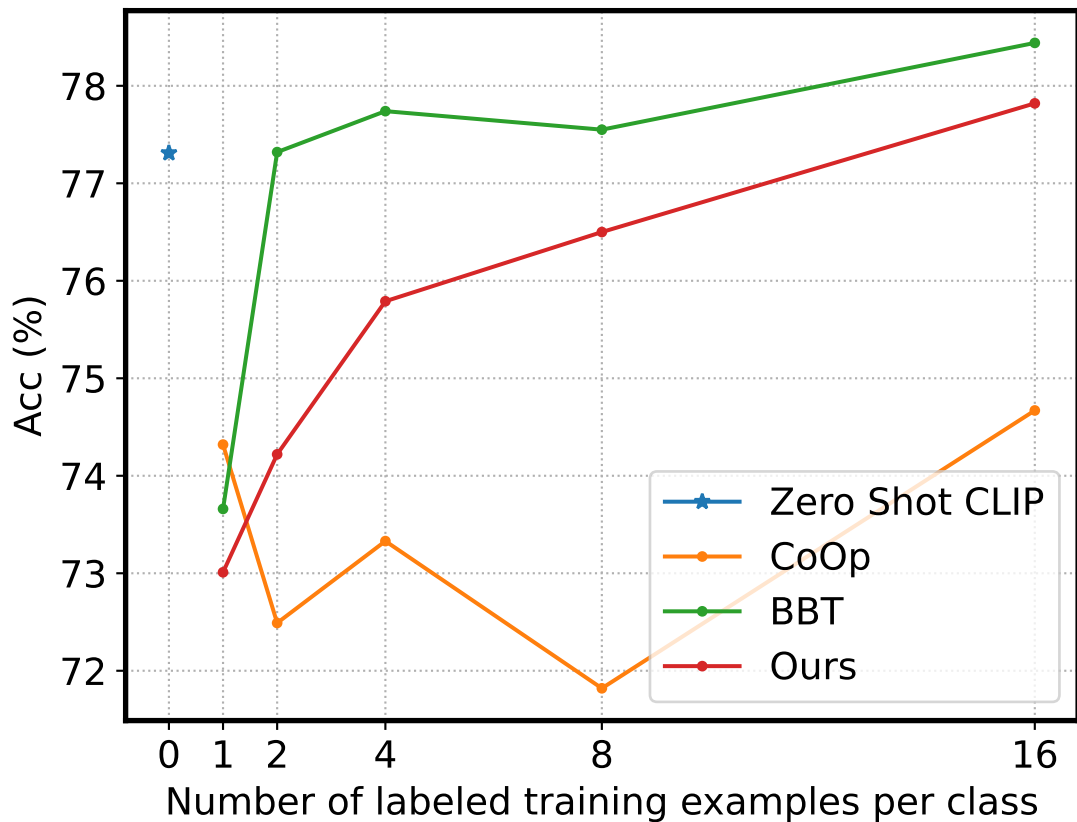

Supplement: supplementary_material [file attachment]

# Flowers102

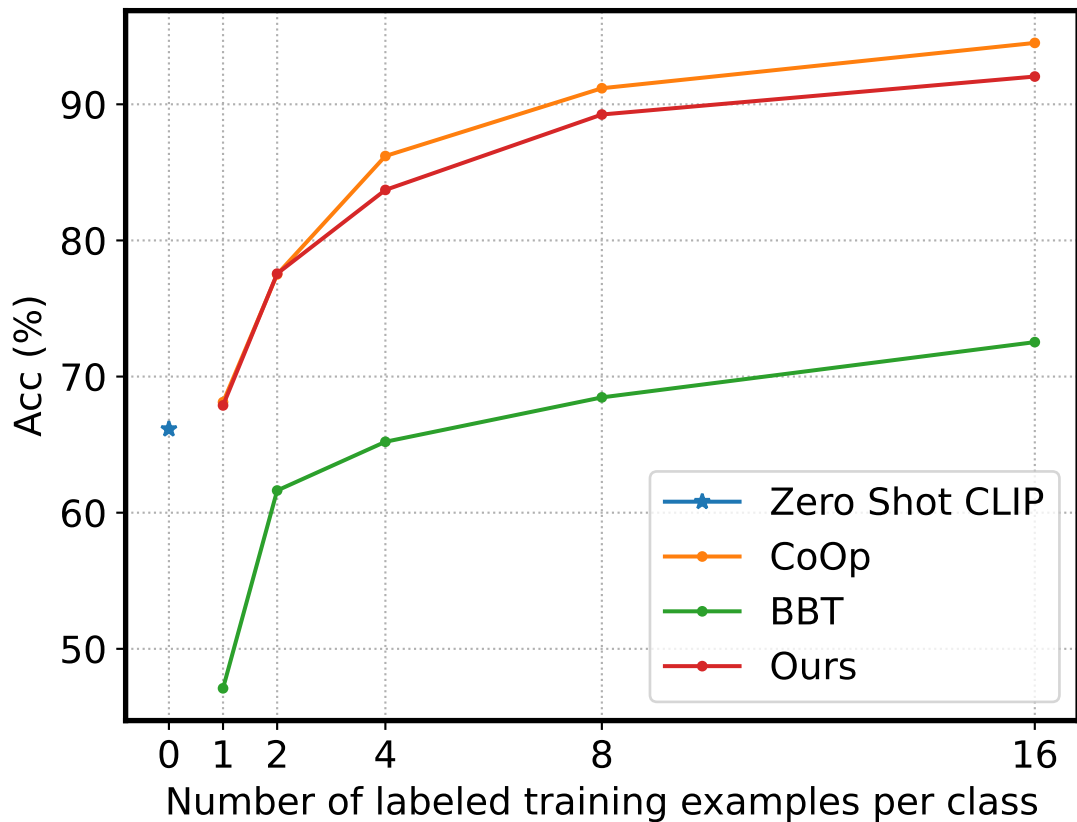

Supplement: supplementary_material [file attachment]
